# Supplementary material
Source: publisher figshare collection journal article supplement (https://acs.figshare.com/ndownloader/files/5152717)
Supplement: Supplementary file 1 [file 5152717]

Archive with 62 entries (59 files):
- supporting_info_ma048665z/Images/
- supporting_info_ma048665z/Images/index_gr_1.gif
- supporting_info_ma048665z/Images/index_gr_10.gif
- supporting_info_ma048665z/Images/index_gr_11.gif
- supporting_info_ma048665z/Images/index_gr_12.gif
- supporting_info_ma048665z/Images/index_gr_13.gif
- supporting_info_ma048665z/Images/index_gr_14.gif
- supporting_info_ma048665z/Images/index_gr_15.gif
- supporting_info_ma048665z/Images/index_gr_16.gif
- supporting_info_ma048665z/Images/index_gr_17.gif
- supporting_info_ma048665z/Images/index_gr_18.gif
- supporting_info_ma048665z/Images/index_gr_19.gif
- supporting_info_ma048665z/Images/index_gr_2.gif
- supporting_info_ma048665z/Images/index_gr_20.gif
- supporting_info_ma048665z/Images/index_gr_21.gif
- supporting_info_ma048665z/Images/index_gr_22.gif
- supporting_info_ma048665z/Images/index_gr_23.gif
- supporting_info_ma048665z/Images/index_gr_24.gif
- supporting_info_ma048665z/Images/index_gr_25.gif
- supporting_info_ma048665z/Images/index_gr_26.gif
- supporting_info_ma048665z/Images/index_gr_27.gif
- supporting_info_ma048665z/Images/index_gr_28.gif
- supporting_info_ma048665z/Images/index_gr_29.gif
- supporting_info_ma048665z/Images/index_gr_3.gif
- supporting_info_ma048665z/Images/index_gr_30.gif
- supporting_info_ma048665z/Images/index_gr_31.gif
- supporting_info_ma048665z/Images/index_gr_32.gif
- supporting_info_ma048665z/Images/index_gr_33.gif
- supporting_info_ma048665z/Images/index_gr_34.gif
- supporting_info_ma048665z/Images/index_gr_35.gif
- supporting_info_ma048665z/Images/index_gr_36.gif
- supporting_info_ma048665z/Images/index_gr_37.gif
- supporting_info_ma048665z/Images/index_gr_38.gif
- supporting_info_ma048665z/Images/index_gr_39.gif
- supporting_info_ma048665z/Images/index_gr_4.gif
- supporting_info_ma048665z/Images/index_gr_40.gif
- supporting_info_ma048665z/Images/index_gr_41.gif
- supporting_info_ma048665z/Images/index_gr_42.gif
- supporting_info_ma048665z/Images/index_gr_43.gif
- supporting_info_ma048665z/Images/index_gr_44.gif
- supporting_info_ma048665z/Images/index_gr_45.gif
- supporting_info_ma048665z/Images/index_gr_46.gif
- supporting_info_ma048665z/Images/index_gr_47.gif
- supporting_info_ma048665z/Images/index_gr_48.gif
- supporting_info_ma048665z/Images/index_gr_49.gif
- supporting_info_ma048665z/Images/index_gr_5.gif
- supporting_info_ma048665z/Images/index_gr_50.gif
- supporting_info_ma048665z/Images/index_gr_51.gif
- supporting_info_ma048665z/Images/index_gr_52.gif
- supporting_info_ma048665z/Images/index_gr_53.gif
- supporting_info_ma048665z/Images/index_gr_54.gif
- supporting_info_ma048665z/Images/index_gr_55.gif
- supporting_info_ma048665z/Images/index_gr_56.gif
- supporting_info_ma048665z/Images/index_gr_57.gif
- supporting_info_ma048665z/Images/index_gr_6.gif
- supporting_info_ma048665z/Images/index_gr_7.gif
- supporting_info_ma048665z/Images/index_gr_8.gif
- supporting_info_ma048665z/Images/index_gr_9.gif
- supporting_info_ma048665z/Images/Thumbs.db
- supporting_info_ma048665z/index.html
- supporting_info_ma048665z/Links/
- supporting_info_ma048665z/
