# Supplementary material
Source: publisher figshare collection journal article supplement (https://acs.figshare.com/ndownloader/files/5152717)
Supplement: Supplementary file 1 [file 5152717 › supporting_info_ma048665z/index.html]

sup. information\_ma048665z.nb


---


Converted by *Mathematica*
     October 7, 2004
