# Supplementary material
Source: publisher figshare collection journal article supplement (https://acs.figshare.com/ndownloader/files/5152717)

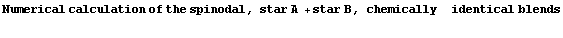

Supplement: Supplementary file 1 [file 5152717 › supporting_info_ma048665z/Images/index_gr_1.gif]

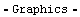

Supplement: Supplementary file 1 [file 5152717 › supporting_info_ma048665z/Images/index_gr_10.gif]

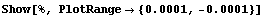

Supplement: Supplementary file 1 [file 5152717 › supporting_info_ma048665z/Images/index_gr_11.gif]

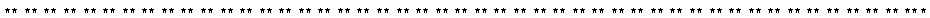

Supplement: Supplementary file 1 [file 5152717 › supporting_info_ma048665z/Images/index_gr_13.gif]

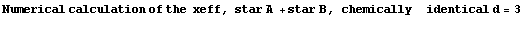

Supplement: Supplementary file 1 [file 5152717 › supporting_info_ma048665z/Images/index_gr_14.gif]

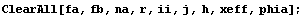

Supplement: Supplementary file 1 [file 5152717 › supporting_info_ma048665z/Images/index_gr_15.gif]

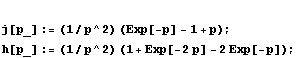

Supplement: Supplementary file 1 [file 5152717 › supporting_info_ma048665z/Images/index_gr_16.gif]

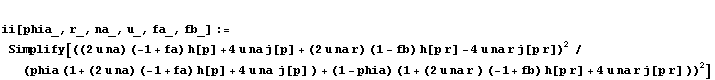

Supplement: Supplementary file 1 [file 5152717 › supporting_info_ma048665z/Images/index_gr_17.gif]

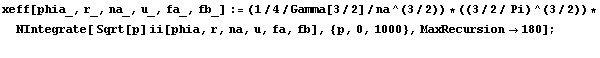

Supplement: Supplementary file 1 [file 5152717 › supporting_info_ma048665z/Images/index_gr_18.gif]

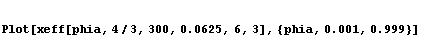

Supplement: Supplementary file 1 [file 5152717 › supporting_info_ma048665z/Images/index_gr_19.gif]

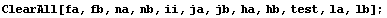

Supplement: Supplementary file 1 [file 5152717 › supporting_info_ma048665z/Images/index_gr_2.gif]

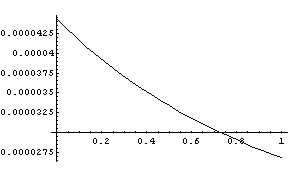

Supplement: Supplementary file 1 [file 5152717 › supporting_info_ma048665z/Images/index_gr_20.gif]

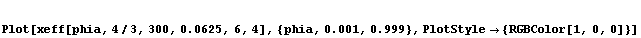

Supplement: Supplementary file 1 [file 5152717 › supporting_info_ma048665z/Images/index_gr_22.gif]

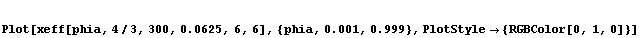

Supplement: Supplementary file 1 [file 5152717 › supporting_info_ma048665z/Images/index_gr_23.gif]

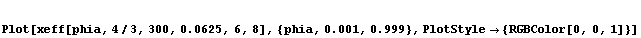

Supplement: Supplementary file 1 [file 5152717 › supporting_info_ma048665z/Images/index_gr_24.gif]

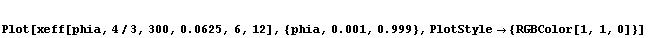

Supplement: Supplementary file 1 [file 5152717 › supporting_info_ma048665z/Images/index_gr_25.gif]

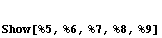

Supplement: Supplementary file 1 [file 5152717 › supporting_info_ma048665z/Images/index_gr_26.gif]

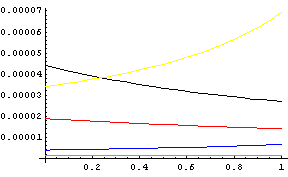

Supplement: Supplementary file 1 [file 5152717 › supporting_info_ma048665z/Images/index_gr_27.gif]

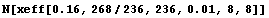

Supplement: Supplementary file 1 [file 5152717 › supporting_info_ma048665z/Images/index_gr_29.gif]

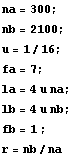

Supplement: Supplementary file 1 [file 5152717 › supporting_info_ma048665z/Images/index_gr_3.gif]

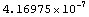

Supplement: Supplementary file 1 [file 5152717 › supporting_info_ma048665z/Images/index_gr_30.gif]

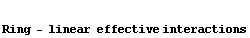

Supplement: Supplementary file 1 [file 5152717 › supporting_info_ma048665z/Images/index_gr_32.gif]

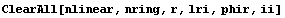

Supplement: Supplementary file 1 [file 5152717 › supporting_info_ma048665z/Images/index_gr_33.gif]

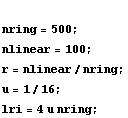

Supplement: Supplementary file 1 [file 5152717 › supporting_info_ma048665z/Images/index_gr_34.gif]

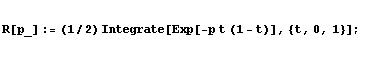

Supplement: Supplementary file 1 [file 5152717 › supporting_info_ma048665z/Images/index_gr_35.gif]

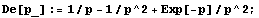

Supplement: Supplementary file 1 [file 5152717 › supporting_info_ma048665z/Images/index_gr_36.gif]

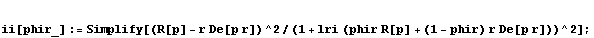

Supplement: Supplementary file 1 [file 5152717 › supporting_info_ma048665z/Images/index_gr_37.gif]

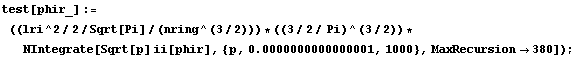

Supplement: Supplementary file 1 [file 5152717 › supporting_info_ma048665z/Images/index_gr_38.gif]

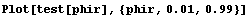

Supplement: Supplementary file 1 [file 5152717 › supporting_info_ma048665z/Images/index_gr_39.gif]

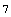

Supplement: Supplementary file 1 [file 5152717 › supporting_info_ma048665z/Images/index_gr_4.gif]

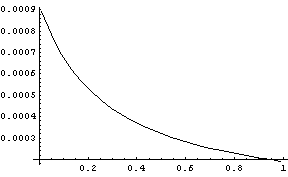

Supplement: Supplementary file 1 [file 5152717 › supporting_info_ma048665z/Images/index_gr_40.gif]

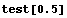

Supplement: Supplementary file 1 [file 5152717 › supporting_info_ma048665z/Images/index_gr_42.gif]

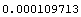

Supplement: Supplementary file 1 [file 5152717 › supporting_info_ma048665z/Images/index_gr_43.gif]

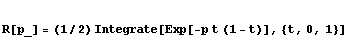

Supplement: Supplementary file 1 [file 5152717 › supporting_info_ma048665z/Images/index_gr_44.gif]

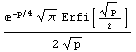

Supplement: Supplementary file 1 [file 5152717 › supporting_info_ma048665z/Images/index_gr_45.gif]

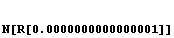

Supplement: Supplementary file 1 [file 5152717 › supporting_info_ma048665z/Images/index_gr_46.gif]

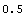

Supplement: Supplementary file 1 [file 5152717 › supporting_info_ma048665z/Images/index_gr_47.gif]

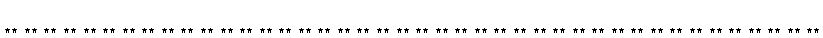

Supplement: Supplementary file 1 [file 5152717 › supporting_info_ma048665z/Images/index_gr_48.gif]

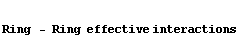

Supplement: Supplementary file 1 [file 5152717 › supporting_info_ma048665z/Images/index_gr_49.gif]

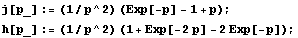

Supplement: Supplementary file 1 [file 5152717 › supporting_info_ma048665z/Images/index_gr_5.gif]

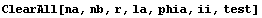

Supplement: Supplementary file 1 [file 5152717 › supporting_info_ma048665z/Images/index_gr_50.gif]

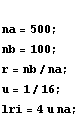

Supplement: Supplementary file 1 [file 5152717 › supporting_info_ma048665z/Images/index_gr_51.gif]

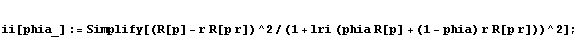

Supplement: Supplementary file 1 [file 5152717 › supporting_info_ma048665z/Images/index_gr_53.gif]

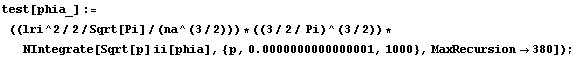

Supplement: Supplementary file 1 [file 5152717 › supporting_info_ma048665z/Images/index_gr_54.gif]

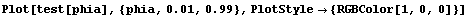

Supplement: Supplementary file 1 [file 5152717 › supporting_info_ma048665z/Images/index_gr_55.gif]

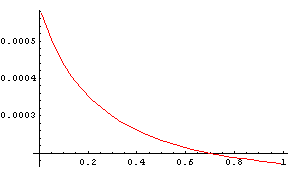

Supplement: Supplementary file 1 [file 5152717 › supporting_info_ma048665z/Images/index_gr_56.gif]

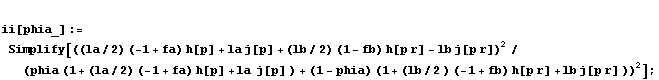

Supplement: Supplementary file 1 [file 5152717 › supporting_info_ma048665z/Images/index_gr_6.gif]

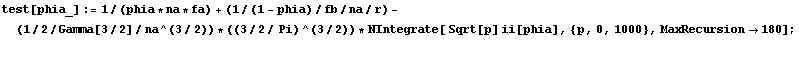

Supplement: Supplementary file 1 [file 5152717 › supporting_info_ma048665z/Images/index_gr_7.gif]

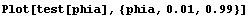

Supplement: Supplementary file 1 [file 5152717 › supporting_info_ma048665z/Images/index_gr_8.gif]

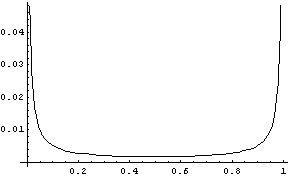

Supplement: Supplementary file 1 [file 5152717 › supporting_info_ma048665z/Images/index_gr_9.gif]
